# Supplementary material for: Tailoring the active phase of CoO-based thin-film catalysts in order to tune selectivity in CO2 hydrogenation
Source: Royal Society of Chemistry journal article supplement (doi:10.1039/d4ra02355b), 2024-01-01
Supplement: d4ra02355b1.pdf [file d4ra02355b1.pdf]

Supporting information

## Tailoring the active phase of CoO-based thin-film catalysts in order to tune selectivity in CO<sub>2</sub> hydrogenation

Niloofer Mohammadpour,\* Hanna Kierzkowska-Pawlak, Jacek Balcerzak, and Jacek Tyczkowski

Department of Molecular Engineering, Faculty of Process and Environmental Engineering,

Lodz University of Technology, Wolczanska 213, 93-005 Lodz

Corresponding Author Email: [niloofer.mohammadpour@dokt.p.lodz.pl](mailto:niloofer.mohammadpour@dokt.p.lodz.pl)

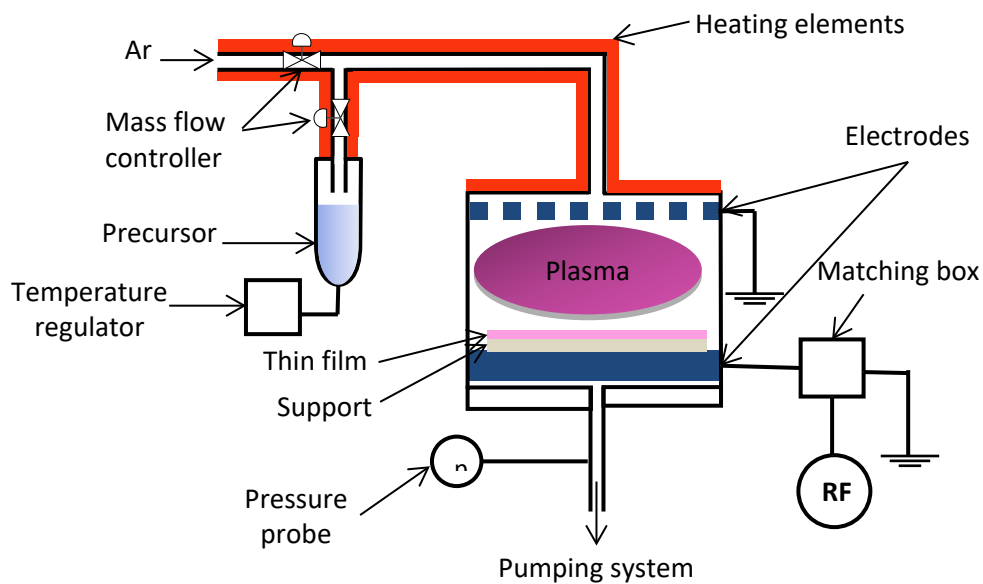

Figure S1. Schematic of PECVD setup for the thin film deposition.

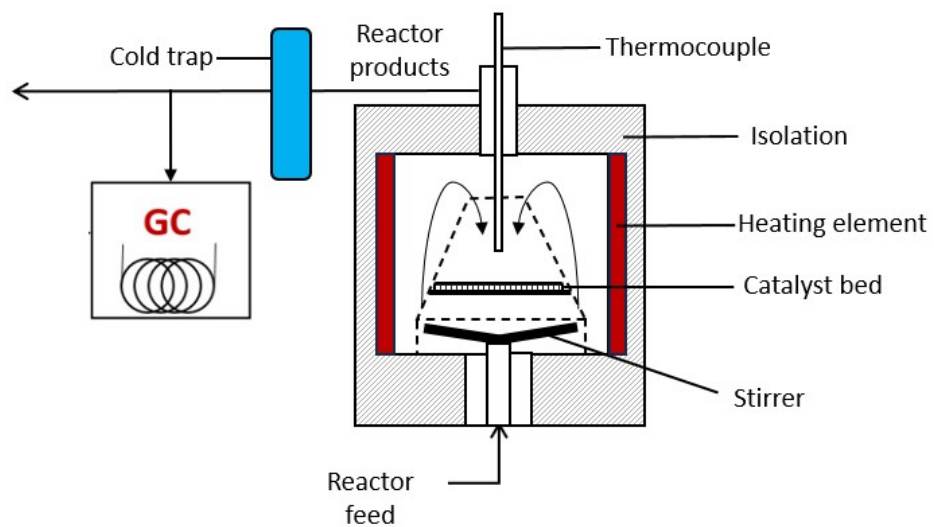

Figure S2. Schematic of CSTR for catalytic test.

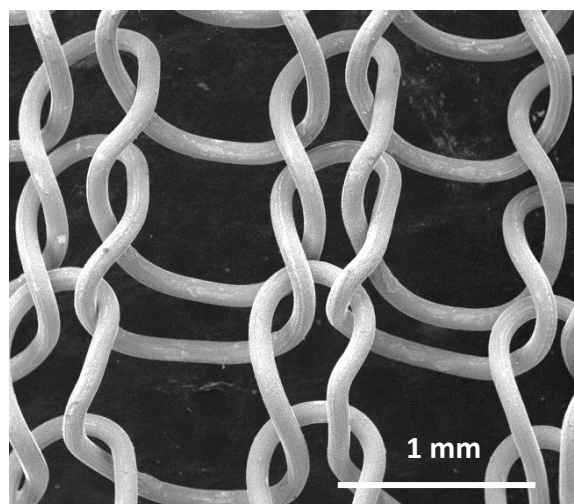

Figure S3. SEM pattern of the wire gauze kanthal steel mesh used as the structured support for a thin-film catalyst.

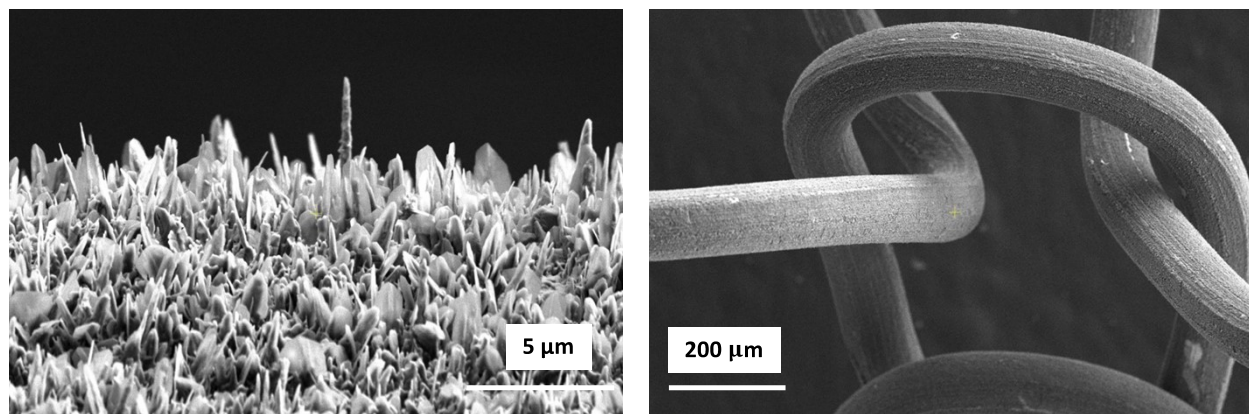

Figure S4. SEM morphology and image of calcined kanthal steel wire gauze meshes.

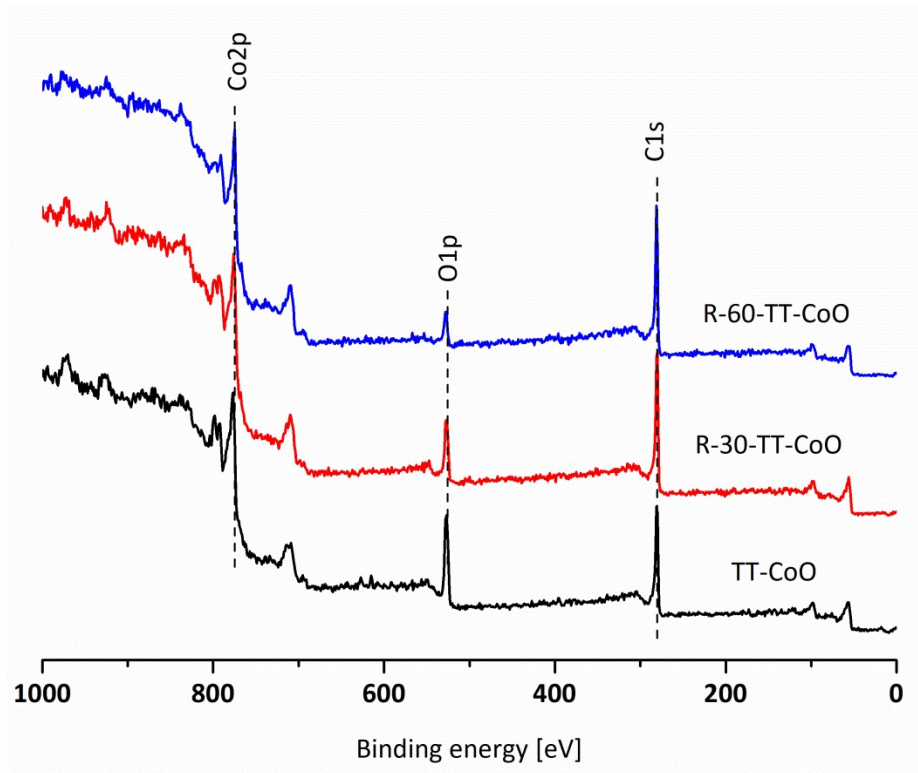

Figure S5. XPS wide spectra of TT-CoO, R-30-CoO, and R-60-TT-CoO thin-film catalysts.

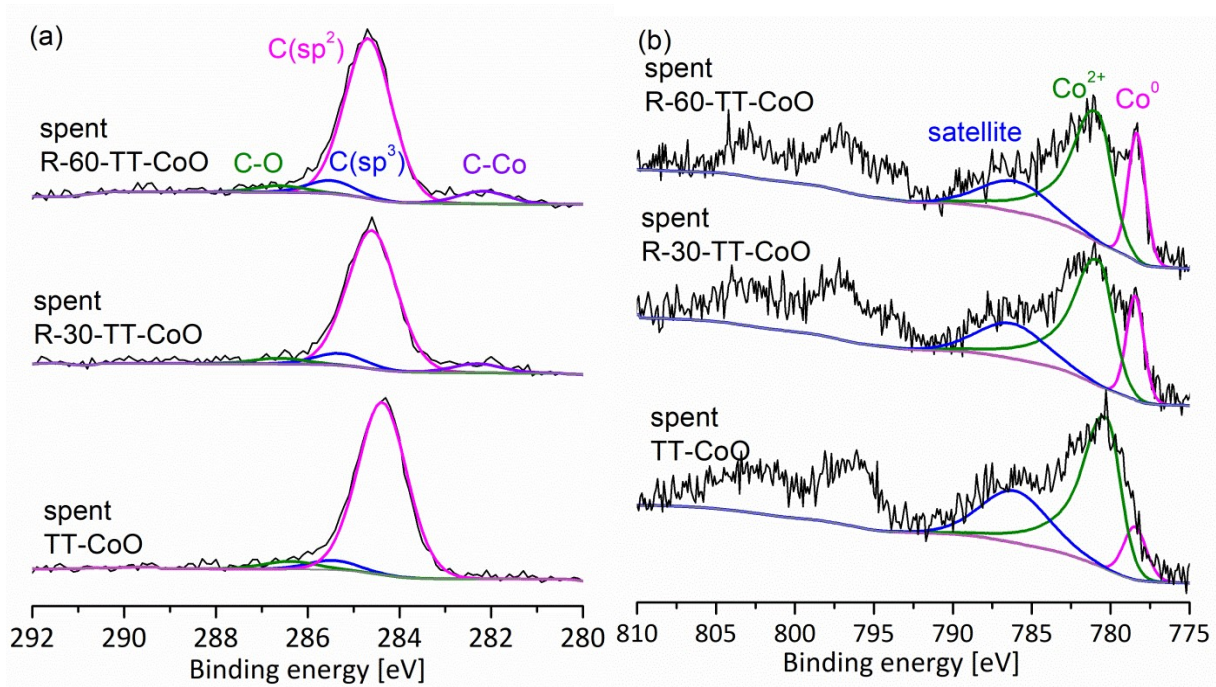

Figure S6. XPS a) C 1s and b) Co 2p of spent TT-CoO, R-30-TT-CoO and R-60-TT-CoO.

Table S1. The CoO/Co<sup>0</sup> ratio on the surface for fresh and spent catalysts.

| Thin film          | CoO/Co <sup>0</sup> |            |
|--------------------|---------------------|------------|
|                    | fresh               | spent      |
| <b>TT-CoO</b>      | 10.2 ± 0.9          | 10.0 ± 0.2 |
| <b>R-30-TT-CoO</b> | 3.1 ± 0.4           | 4.5 ± 0.4  |
| <b>R-60-TT-CoO</b> | 1.1 ± 0.1           | 3.8 ± 0.3  |

The spent series are referred to as catalytic films after applying in CO<sub>2</sub> methanation reaction in the temperature range of 250-400 °C. It is observed that the TT-CoO catalyst exhibits excellent stability during the CO<sub>2</sub> methanation reaction. However, the pre-reduced catalysts become partially oxidized in the reaction mixture, as evidenced by the increase in the CoO/Co<sup>0</sup> ratio after the reaction compared to the fresh samples (Table S1).
